# Supplementary material for: Cu@CuO promoted g-C3N4/MCM-41: an efficient photocatalyst with tunable valence transition for visible light induced hydrogen generation
Source: Royal Society of Chemistry journal article supplement (doi:10.1039/c6ra24358d), 2016-01-01
Supplement: c6ra24358d1.pdf [file c6ra24358d1.pdf]

### Supporting Information

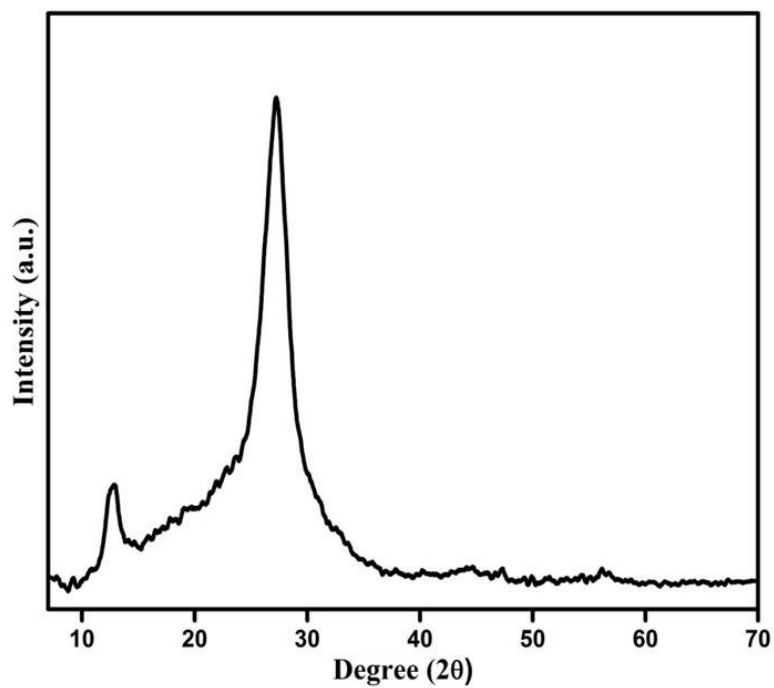

Figure S1: XRD patterns of gC<sub>3</sub>N<sub>4</sub>

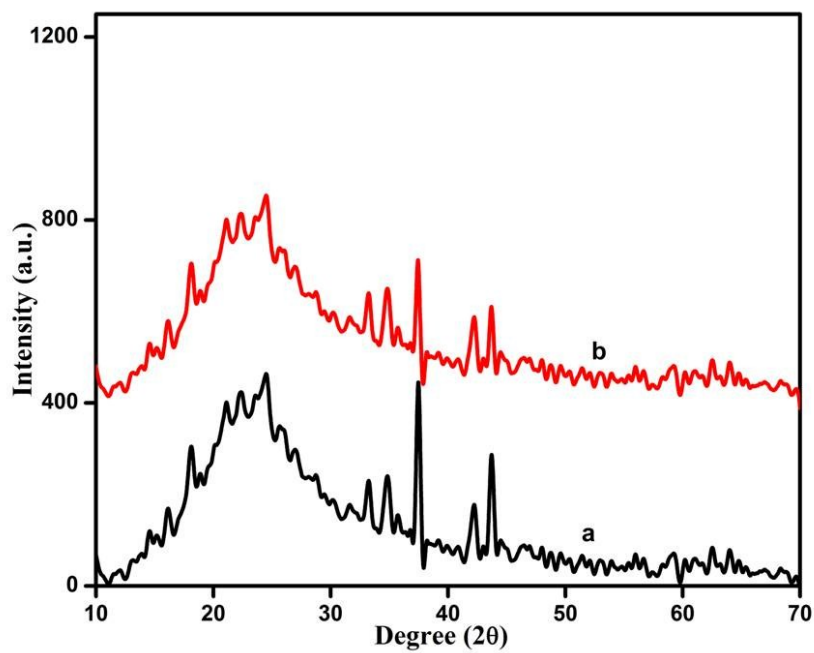

Figure S2: XRD patterns of CCM-4 (a) and CCM-4 after 5 runs (b)

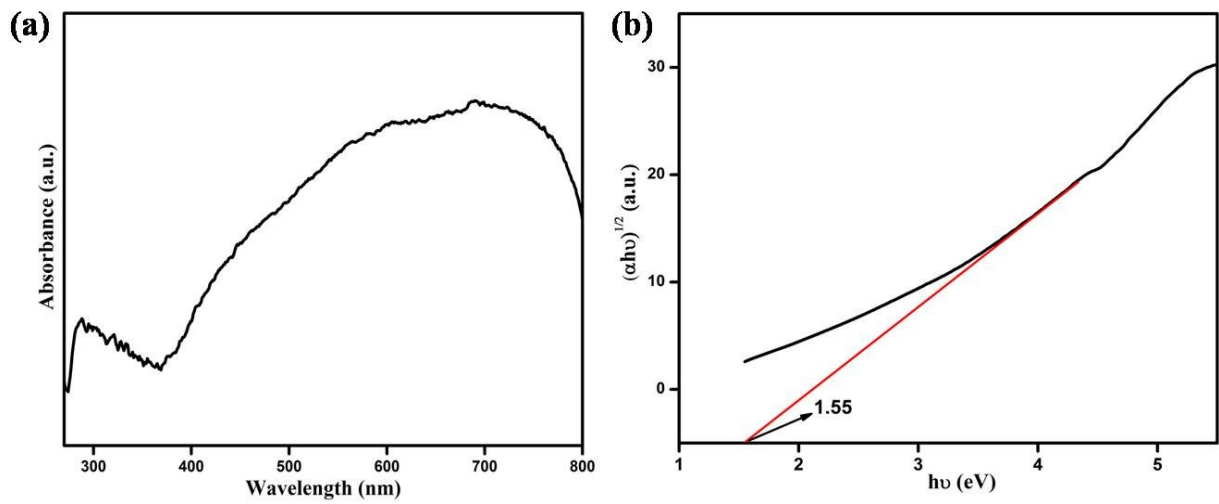

Figure S3: UV-Visible absorption spectra (a) and calculated band gap (b) of CuO
